# Supplementary material for: The Role of Cysteine Protease Cathepsins B, H, C, and X/Z in Neurodegenerative Diseases and Cancer
Source: Int J Mol Sci. 2023 Oct 26;24(21):15613. doi: 10.3390/ijms242115613 (PMC10650516; doi:10.3390/ijms242115613)
Supplement: Supplementary file 1 [file ijms-24-15613-s001.zip]

Archive with 6 entries (6 files):
- File S1.txt
- File S2.txt
- File S3.txt
- File S4.txt
- Supplementary Materials-final.pdf
- Table  S1.xlsx
