# Supplementary material for: The Role of Cysteine Protease Cathepsins B, H, C, and X/Z in Neurodegenerative Diseases and Cancer
Source: Int J Mol Sci. 2023 Oct 26;24(21):15613. doi: 10.3390/ijms242115613 (PMC10650516; doi:10.3390/ijms242115613)
Supplement: Supplementary file 1 [file ijms-24-15613-s001.zip › Table S1.xlsx]

## Sheet: Sheet1
Table S1. Classification of human cathepsins according to the MEROPS database of proteolytic enzymes [39].
Catalytic type	MEROPS ID	MEROPS Name	Other names	MEROPS Classification	LINK
Cysteine Peptidase	C01.060	cathepsin B		Clan CA >> Subclan (none) >> Family C1 >> Subfamily A >> C01.060	https://www.ebi.ac.uk/merops/cgi-bin/pepsum?id=C01.060
	C01.070	dipeptidyl-peptidase I	cathepsin C, cathepsin J, CTSC g.p. (Homo sapiens), DAPase, dipeptidyl aminopeptidase I, dipeptidyl transferase, DPP I, DPP 1, TAGZyme	Clan CA >> Subclan (none) >> Family C1 >> Subfamily A >> C01.070	https://www.ebi.ac.uk/merops/cgi-bin/pepsum?id=C01.070
	C01.018	cathepsin F	CLN13 (Homo sapiens), CTSF g.p. (Homo sapiens)	Clan CA >> Subclan (none) >> Family C1 >> Subfamily A >> C01.018	https://www.ebi.ac.uk/merops/cgi-bin/pepsum?id=C01.018
	C01.040	cathepsin H	benzoylarginine-naphthylamide (BANA) hydrolase, cathepsin B3, CTSH g.p. (Homo sapiens), lysosomal arginyl aminopeptidase	Clan CA >> Subclan (none) >> Family C1 >> Subfamily A >> C01.040	https://www.ebi.ac.uk/merops/cgi-bin/pepsum?id=C01.040
	C01.036	cathepsin K	cathepsin O [obs.], cathepsin O2 [obs.], cathepsin X [obs.], Ctsk g.p. (Homo sapiens)	Clan CA >> Subclan (none) >> Family C1 >> Subfamily A >> C01.036	https://www.ebi.ac.uk/merops/cgi-bin/pepsum?id=C01.036
	C01.032	cathepsin L	cathepsin L1 (Homo sapiens)	Clan CA >> Subclan (none) >> Family C1 >> Subfamily A >> C01.032	https://www.ebi.ac.uk/merops/cgi-bin/pepsum?id=C01.032
	C01.035	cathepsin O	CTSO g.p. (Homo sapiens)	Clan CA >> Subclan (none) >> Family C1 >> Subfamily A >> C01.035	https://www.ebi.ac.uk/merops/cgi-bin/pepsum?id=C01.035
	C01.034	cathepsin S	CTSS g.p. (Homo sapiens)	Clan CA >> Subclan (none) >> Family C1 >> Subfamily A >> C01.034	https://www.ebi.ac.uk/merops/cgi-bin/pepsum?id=C01.034
	C01.009	cathepsin V	cathepsin L2 (Homo sapiens), cathepsin U, CTSL2 g.p. [obs.], CTSLV g.p. (Homo sapiens), CTSV g.p. (Homo sapiens)	Clan CA >> Subclan (none) >> Family C1 >> Subfamily A >> C01.009	https://www.ebi.ac.uk/merops/cgi-bin/pepsum?id=C01.009
	C01.037	cathepsin W	Ctsw g.p. (Homo sapiens), lymphopain	Clan CA >> Subclan (none) >> Family C1 >> Subfamily A >> C01.037	https://www.ebi.ac.uk/merops/cgi-bin/pepsum?id=C01.037
	C01.013	cathepsin X	cathepsin Z [obs.], cathepsin P [obs.], cathepsin IV, cathepsin B2, cathepsin Y, CTSZ g.p. (Homo sapiens), cysteine-type carboxypeptidase, lysosomal carboxypeptidase B, carboxypeptidase LB	Clan CA >> Subclan (none) >> Family C1 >> Subfamily A >> C01.013	https://www.ebi.ac.uk/merops/cgi-bin/pepsum?id=C01.013
Serine Peptidase	S10.002	serine carboxypeptidase A	carboxypeptidase-L, carboxypeptidase Y-like kininase, cathepsin A, cathepsin I (obs.), CTSA g.p. (Homo sapiens), deamidase, lysosomal carboxypeptidase A, lysosomal protective protein, protective protein, urinary kininase	Clan SC >> Subclan (none) >> Family S10 >> Subfamily (none) >> S10.002	https://www.ebi.ac.uk/merops/cgi-bin/pepsum?id=S10.002
	S01.133	cathepsin G	CatG, CTSG g.p. (Homo sapiens), Stat5 protease	Clan PA >> Subclan PA(S) >> Family S1 >> Subfamily A >> S01.133	https://www.ebi.ac.uk/merops/cgi-bin/pepsum?id=S01.133
Aspartic Peptidase	A01.009	cathepsin D	CatD, CLN10 (Homo sapiens), CTSD g.p. (Homo sapiens)	Clan AA >> Subclan (none) >> Family A1 >> Subfamily A >> A01.009	https://www.ebi.ac.uk/merops/cgi-bin/pepsum?id=A01.009
	A01.010	cathepsin E	CTSE g.p. (Homo sapiens), erythrocyte membrane aspartic proteinase, gastric cathepsin, slow-moving proteinase	Clan AA >> Subclan (none) >> Family A1 >> Subfamily A >> A01.010	https://www.ebi.ac.uk/merops/cgi-bin/pepsum?id=A01.010
